# Supplementary material for: High Andean Steppes of Southern Chile Contain Little-Explored Peltigera Lichen Symbionts
Source: MDPI journal article supplement (doi:10.3390/jof9030372), 2023-03-18
Supplement: s1 [file s1]

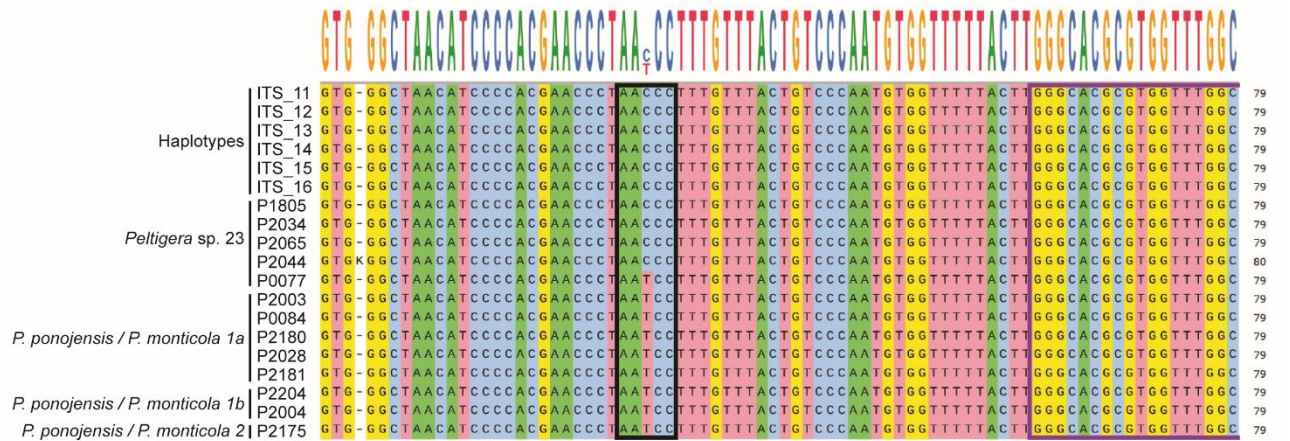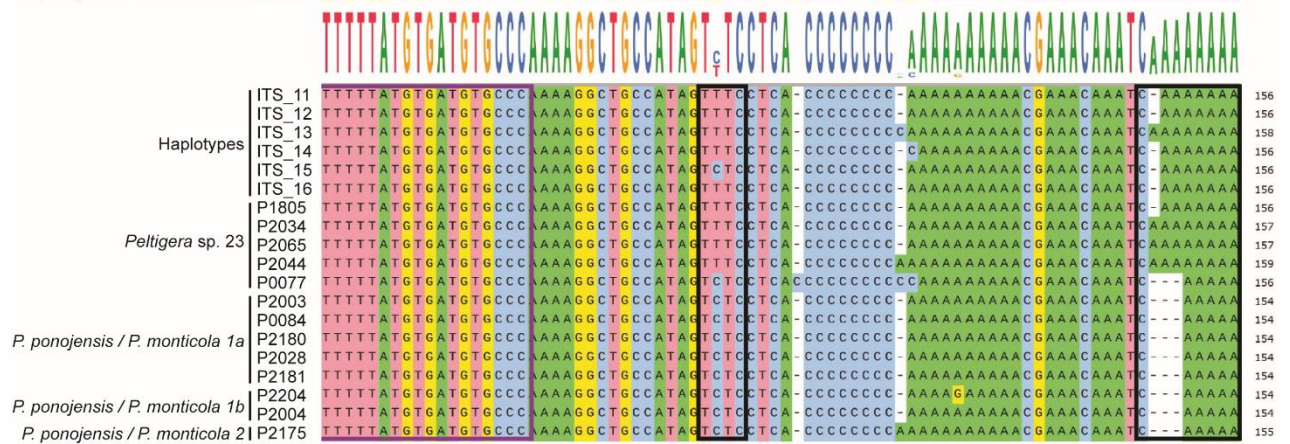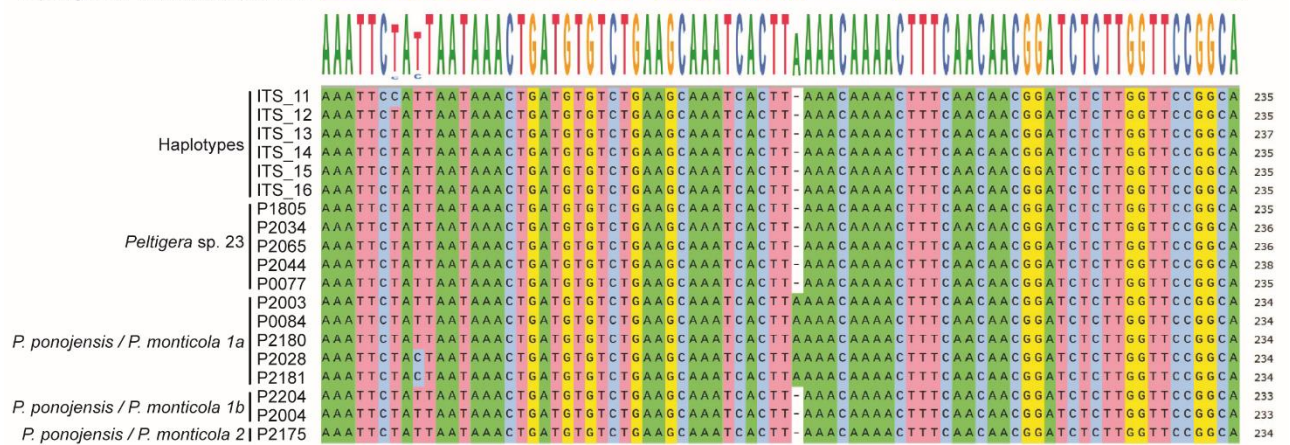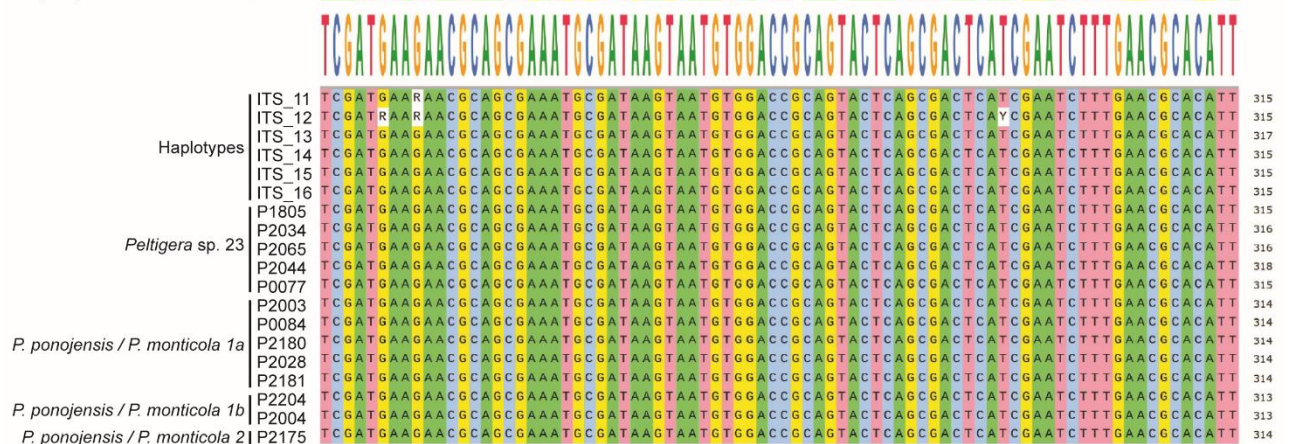



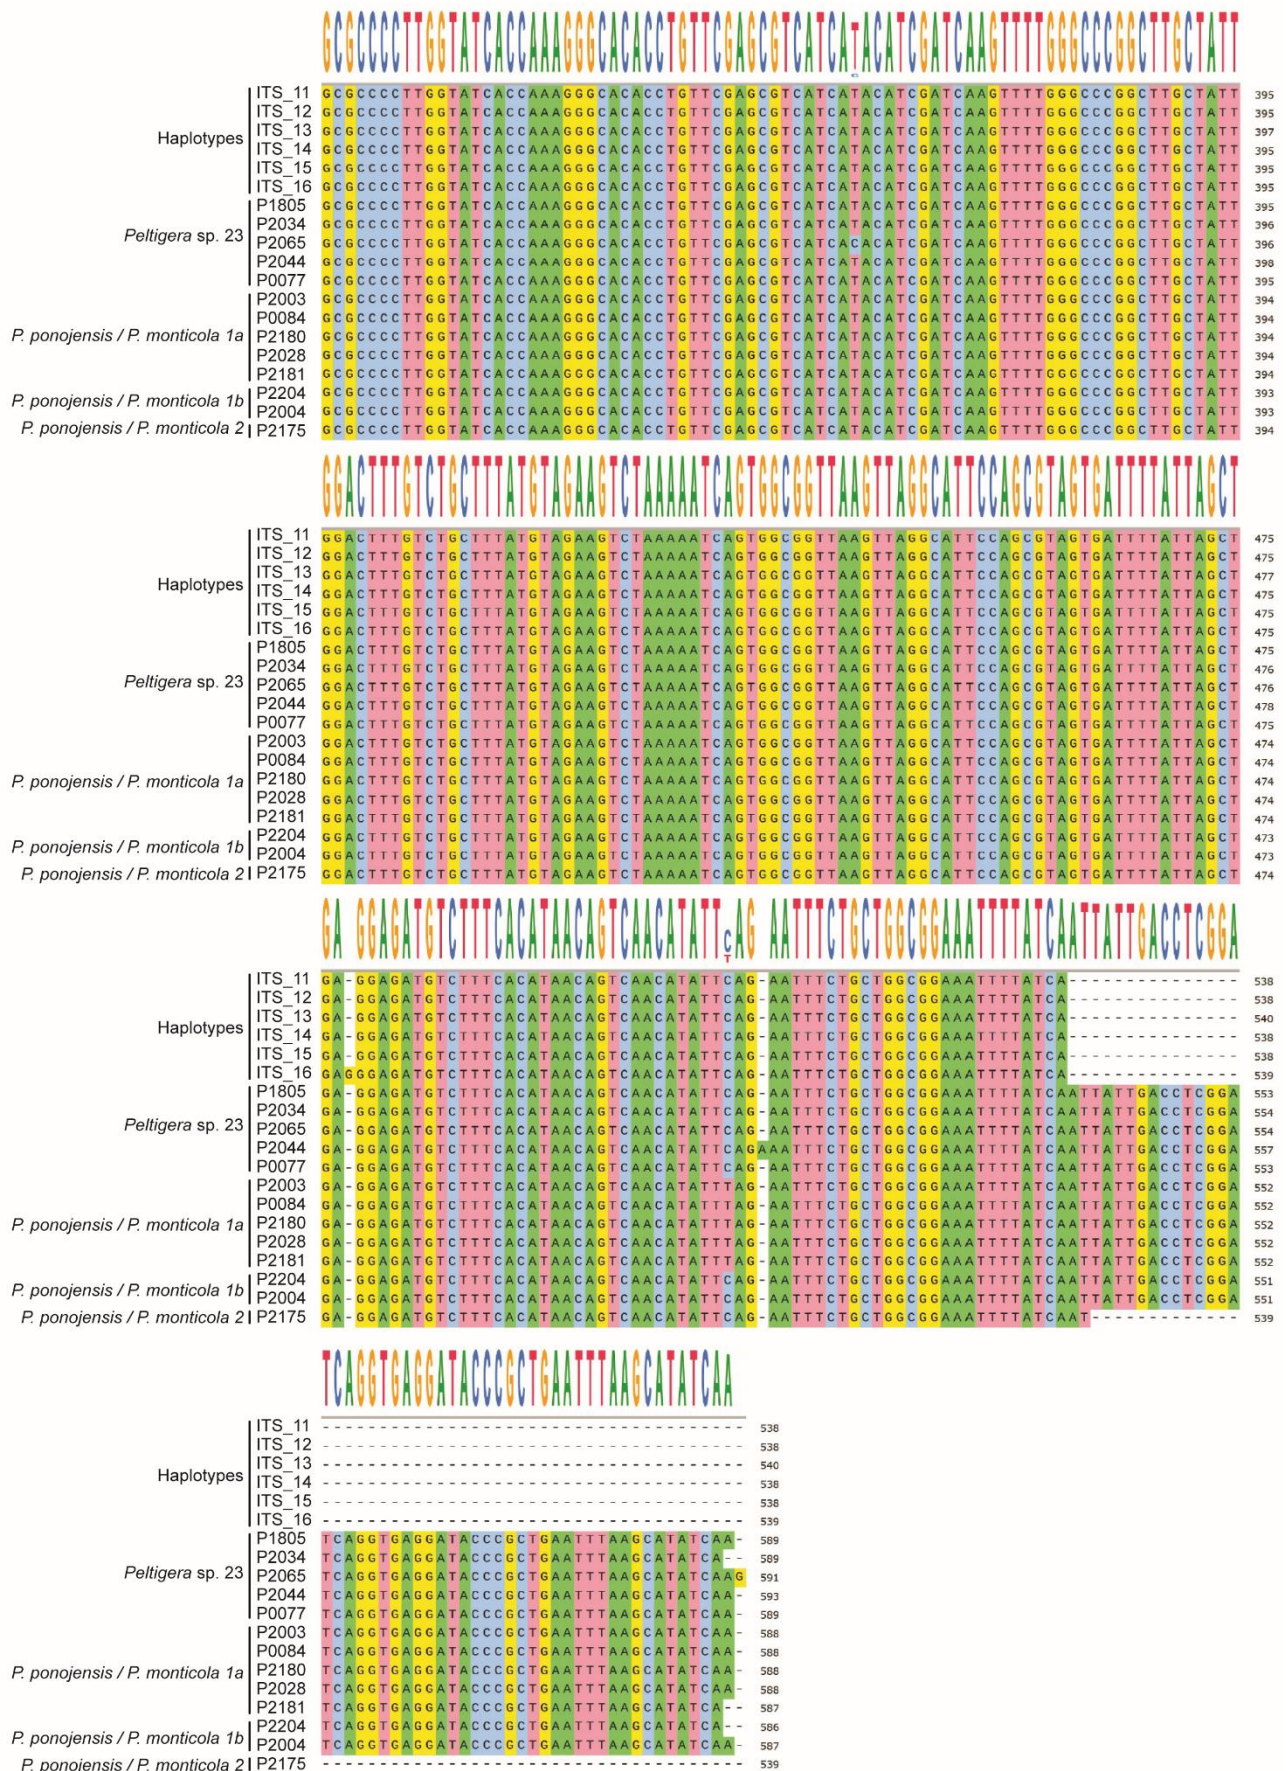

**Figure S2.** Alignment of ITS haplotypes associated with clade 5 with the closest reference sequences according to phylogenetic analysis. Representatives of *P. antarctica* and *P. ponojensis* / *P. monticola* 1a, 1b and 2 are included.
