# Supplementary material for: High Andean Steppes of Southern Chile Contain Little-Explored Peltigera Lichen Symbionts
Source: MDPI journal article supplement (doi:10.3390/jof9030372), 2023-03-18
Supplement: s1 [file s1]

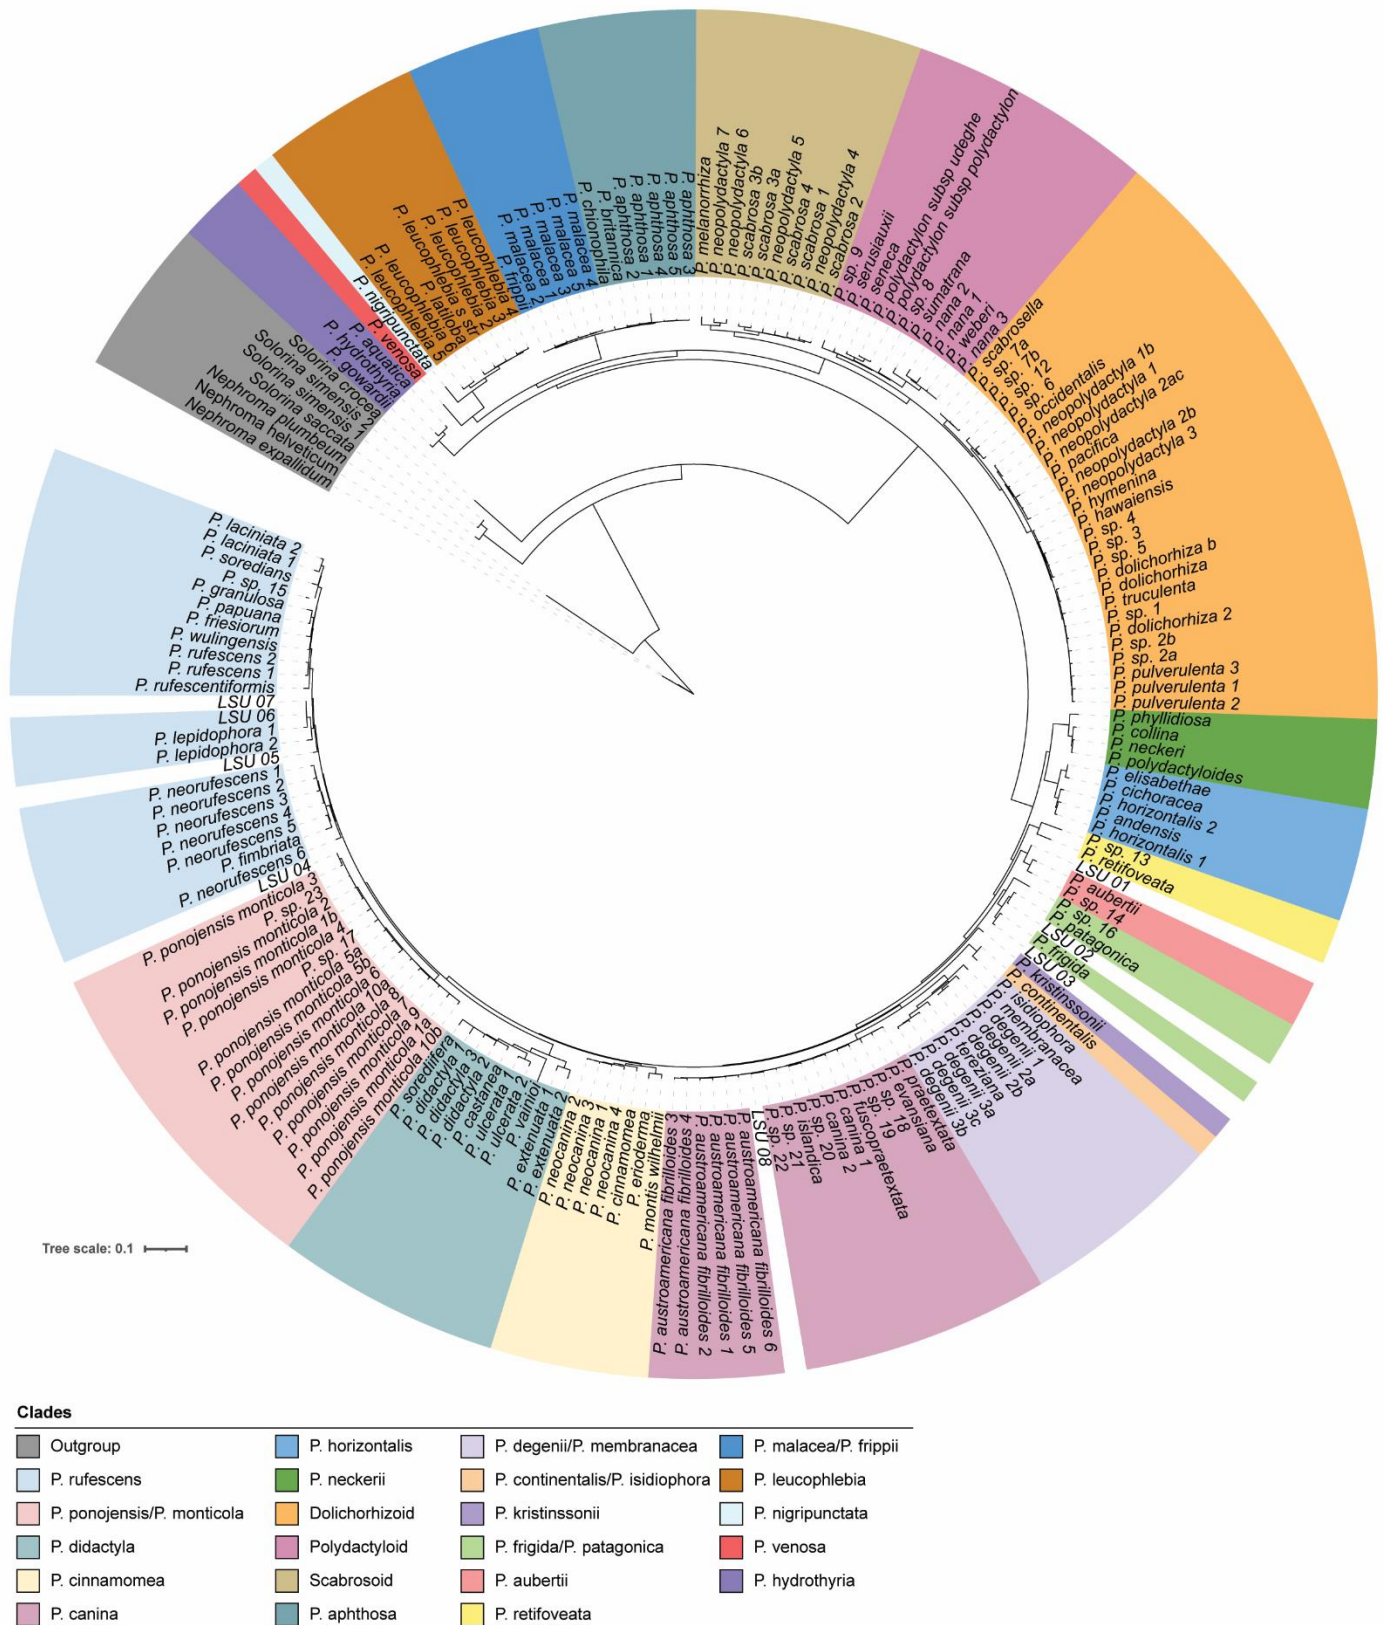

**Figure S1.** Evolutionary Placement Algorithm as implemented in the Tree-Based Alignment Selector toolkit (TBAS) using the genus *Peltigera* reference tree-based LSU sequences.
