# Supplementary material for: High Andean Steppes of Southern Chile Contain Little-Explored Peltigera Lichen Symbionts
Source: J Fungi (Basel). 2023 Mar 18;9(3):372. doi: 10.3390/jof9030372 (PMC10058012; doi:10.3390/jof9030372)
Supplement: Supplementary file 1 [file jof-09-00372-s001.zip]

Archive with 7 entries (7 files):
- Figure S1.pdf
- Figure S1.tif
- Figure S2.pdf
- Figure S2.tif
- Table S1.xlsx
- Table S2.xlsx
- Table S3.xlsx
