# Supplementary material for: High Andean Steppes of Southern Chile Contain Little-Explored Peltigera Lichen Symbionts
Source: J Fungi (Basel). 2023 Mar 18;9(3):372. doi: 10.3390/jof9030372 (PMC10058012; doi:10.3390/jof9030372)
Supplement: Supplementary file 1 [file jof-09-00372-s001.zip › Table S1.xlsx]

## Sheet: Hoja1
Table S1. Geo-reference and identification information of the samples analyzed in this study.
Site	Sample	Geo-reference data			Haplotypes						Sequence accesion numbers (GenBank)						OTUs	Peltigera identification
					Mycobiont				Cyanobiont		Mycobiont				Cyanobiont		Mycobiont
		Latitude (S)	Longitude (W)	Altitude (m.a.s.l.)	LSU	TUB	COR	ITS	RBC	SSU	LSU	TUB	COR	ITS	RBC	SSU	Concatenated sequences	Clade	Species
Coyhaique	COY18-023	-45.5148	-72.04	1246	LSU_07	TUB_10	COR_09	ITS_20	RBC_01	SSU_01	OP602885	OP641949	OP612339	OP602825	OP822077	OP600394	OTU01	-	Peltigera sp. 24
	COY18-024	-45.5148	-72.0399	1245	LSU_08	TUB_11	COR_13	ITS_25	RBC_04	SSU_04	OP602886	OP641950	OP612340	OP602826	OP822078	OP600395	OTU02	9	P. fuscopraetextata
	COY18-025	-45.5147	-72.0398	1247	LSU_08	TUB_11	COR_13	ITS_25	RBC_05	SSU_04	OP602887	OP641951	OP612341	OP602827	OP822079	OP600396	OTU02	9	P. fuscopraetextata
	COY18-026	-45.5147	-72.0399	1247	LSU_06	TUB_10	COR_11	ITS_21	RBC_01	SSU_01	OP602888	OP641952	OP612342	OP602828	OP822080	OP600397	OTU03	-	Peltigera sp. 24
	COY18-027	-45.5146	-72.0396	1247	LSU_06	TUB_10	COR_11	ITS_21	RBC_01	SSU_01	OP602889	OP641953	OP612343	OP602829	OP822081	OP600398	OTU04	-	Peltigera sp. 24
	COY18-028	-45.5146	-72.0394	1245	LSU_03	TUB_02	COR_02	ITS_02	RBC_04	SSU_04	OP602890	OP641954	OP612344	OP602830	OP822082	OP600399	OTU05	2	P. frigida
	COY18-029	-45.5146	-72.0393	1244	LSU_02	TUB_03	COR_03	ITS_07	RBC_08	SSU_06	OP602891	OP641955	OP612345	OP602831	OP822083	OP600400	OTU06	2	P. patagonica
	COY18-030	-45.5146	-72.0393	1244	LSU_01	TUB_01	COR_01	ITS_01	RBC_11	SSU_07	OP602892	OP641956	OP612346	OP602832	OP822084	OP600401	OTU07	2	P. aubertti
	COY18-031	-45.5146	-72.0388	1242	LSU_07	TUB_10	COR_09	ITS_19	RBC_02	SSU_05	OP602893	OP641957	OP612347	OP602833	OP822085	OP600402	OTU01	-	Peltigera sp. 24
	COY18-032	-45.5145	-72.0387	1242	LSU_07	TUB_10	COR_11	ITS_22	RBC_01	SSU_01	OP602894	OP641958	OP612348	OP602834	OP822086	OP600403	OTU08	-	Peltigera sp. 24
	COY18-033	-45.5126	-72.037	1267	LSU_08	TUB_11	COR_12	ITS_25	RBC_05	SSU_04	OP602895	OP641959	OP612349	OP602835	OP822087	OP600404	OTU02	9	P. fuscopraetextata
	COY18-034	-45.5127	-72.037	1267	LSU_08	TUB_11	COR_13	ITS_24	RBC_04	SSU_04	OP602896	OP641960	OP612350	OP602836	OP822088	OP600405	OTU09	9	P. fuscopraetextata
	COY18-035	-45.5128	-72.0369	1267	LSU_04	TUB_08	COR_05	ITS_11	RBC_01	SSU_04	OP602897	OP641961	OP612351	OP602837	OP822089	OP600406	OTU10	5	Peltigera sp. 23
	COY18-036	-45.5129	-72.0368	1267	LSU_07	TUB_10	COR_11	ITS_19	RBC_01	SSU_01	OP602898	OP641962	OP612352	OP602838	OP822090	OP600407	OTU04	-	Peltigera sp. 24
	COY18-037	-45.513	-72.0367	1266	LSU_04	TUB_08	COR_05	ITS_13	RBC_04	SSU_04	OP602899	OP641963	OP612353	OP602839	OP822091	OP600408	OTU11	5	Peltigera sp. 23
	COY18-038	-45.5131	-72.0366	1266	LSU_04	TUB_07	COR_05	ITS_11	RBC_06	SSU_04	OP602900	OP641964	OP612354	OP602840	OP822092	OP600409	OTU12	5	Peltigera sp. 23
	COY18-039	-45.5132	-72.0365	1265	LSU_04	TUB_06	COR_05	ITS_13	RBC_04	SSU_04	OP602901	OP641965	OP612355	OP602841	OP822093	OP600410	OTU13	5	Peltigera sp. 23
	COY18-040	-45.5133	-72.0363	1265	LSU_06	TUB_10	COR_11	ITS_21	RBC_01	-	OP602902	OP641966	OP612356	OP602842	OP822094	-	OTU04	-	Peltigera sp. 24
	COY18-041	-45.5134	-72.0361	1267	LSU_07	TUB_10	COR_09	ITS_20	RBC_01	SSU_01	OP602903	OP641967	OP612357	OP602843	OP822095	OP600411	OTU01	-	Peltigera sp. 24
	COY18-042	-45.5135	-72.036	1267	LSU_07	TUB_10	COR_10	ITS_20	RBC_01	-	OP602904	OP641968	OP612358	OP602844	OP822096	-	OTU01	-	Peltigera sp. 24
Karukinka	KAR20-302	-54.1206	-68.7252	436	LSU_08	TUB_11	COR_13	ITS_25	RBC_04	SSU_04	OP602905	OP641969	OP612359	OP602845	OP822097	OP600412	OTU02	9	P. fuscopraetextata
	KAR20-303	-54.1206	-68.7255	440	LSU_08	TUB_11	COR_13	ITS_25	RBC_04	SSU_04	OP602906	OP641970	OP612360	OP602846	OP822098	OP600413	OTU02	9	P. fuscopraetextata
	KAR20-304	-54.1206	-68.7253	437	LSU_08	TUB_11	COR_13	ITS_25	RBC_04	SSU_04	OP602907	OP641971	OP612361	OP602847	OP822099	OP600414	OTU02	9	P. fuscopraetextata
	KAR20-305	-54.1206	-68.7253	436	LSU_05	TUB_09	COR_08	ITS_18	RBC_09	SSU_02	OP602908	OP641972	OP612362	OP602848	OP822100	OP600415	OTU14	-	P. rufescens
	KAR20-309	-54.1206	-68.7253	436	LSU_08	TUB_11	COR_13	ITS_25	RBC_07	SSU_04	OP602909	OP641973	OP612363	OP602849	OP822101	OP600416	OTU02	9	P. fuscopraetextata
	KAR20-312	-54.1207	-68.7254	436	LSU_08	TUB_11	COR_13	ITS_25	RBC_04	SSU_04	OP602910	OP641974	OP612364	OP602850	OP822102	OP600417	OTU02	9	P. fuscopraetextata
	KAR20-319	-54.1207	-68.7254	437	LSU_08	TUB_11	COR_13	ITS_25	RBC_04	SSU_04	OP602911	OP641975	OP612365	OP602851	OP822103	OP600418	OTU02	9	P. fuscopraetextata
	KAR20-326	-54.1207	-68.7254	436	LSU_08	TUB_11	COR_13	ITS_25	RBC_07	SSU_04	OP602912	OP641976	OP612366	OP602852	OP822104	OP600419	OTU02	9	P. fuscopraetextata
	KAR20-330	-54.1207	-68.7255	436	LSU_08	TUB_11	COR_13	ITS_26	RBC_07	SSU_04	OP602913	OP641977	OP612367	OP602853	OP822105	OP600420	OTU02	9	P. fuscopraetextata
	KAR20-335	-54.1206	-68.7255	438	LSU_08	TUB_11	COR_13	ITS_25	RBC_07	SSU_04	OP602914	OP641978	OP612368	OP602854	OP822106	OP600421	OTU02	9	P. fuscopraetextata
	KAR20-336	-54.1206	-687.255	439	LSU_08	TUB_11	COR_13	ITS_25	RBC_04	SSU_04	OP602915	OP641979	OP612369	OP602855	OP822107	OP600422	OTU02	9	P. fuscopraetextata
	KAR20-340	-54.1207	-68.7256	438	LSU_08	TUB_11	COR_13	ITS_25	RBC_07	SSU_04	OP602916	OP641980	OP612370	OP602856	OP822108	OP600423	OTU02	9	P. fuscopraetextata
	KAR20-341	-54.1207	-68.7256	438	LSU_07	TUB_10	COR_11	ITS_23	RBC_03	SSU_01	OP602917	OP641981	OP612371	OP602857	OP822109	OP600424	OTU15	-	Peltigera sp. 24
	KAR20-344	-54.1207	-68.7256	438	LSU_08	TUB_11	COR_13	ITS_27	RBC_04	SSU_04	OP602918	OP641982	OP612372	OP602858	OP822110	OP600425	OTU16	9	P. fuscopraetextata
	KAR20-345	-54.1207	-68.7255	437	LSU_08	TUB_11	COR_13	ITS_27	RBC_04	SSU_04	OP602919	OP641983	OP612373	OP602859	OP822111	OP600426	OTU16	9	P. fuscopraetextata
	KAR20-348	-54.1207	-68.7256	436	LSU_08	TUB_11	COR_13	ITS_25	RBC_07	SSU_04	OP602920	OP641984	OP612374	OP602860	OP822112	OP600427	OTU02	9	P. fuscopraetextata
	KAR20-350	-54.1207	-68.7257	437	LSU_08	TUB_11	COR_13	ITS_27	RBC_07	SSU_04	OP602921	OP641985	OP612375	OP602861	OP822113	OP600428	OTU16	9	P. fuscopraetextata
	KAR20-352	-54.1207	-68.7257	438	LSU_08	TUB_11	COR_13	ITS_27	RBC_07	SSU_04	OP602922	OP641986	OP612376	OP602862	OP822114	OP600429	OTU16	9	P. fuscopraetextata
	KAR20-353	-54.1208	-68.7257	436	LSU_04	TUB_06	COR_07	ITS_16	RBC_04	SSU_04	OP602923	OP641987	OP612377	OP602863	OP822115	OP600430	OTU17	5	Peltigera sp. 23
	KAR20-354	-54.1208	-68.7257	437	LSU_05	TUB_09	COR_08	ITS_17	RBC_10	SSU_03	OP602924	OP641988	OP612378	OP602864	OP822116	OP600431	OTU14	-	P. rufescens
Navarino	NAV20-379	-54.9596	-67.6327	558	LSU_02	TUB_03	COR_03	ITS_09	RBC_08	SSU_06	OP602925	OP641989	OP612379	OP602865	OP822117	OP600432	OTU18	2	P. patagonica
	NAV20-381	-54.9595	-67.6327	555	LSU_02	TUB_03	COR_03	ITS_06	RBC_08	SSU_06	OP602926	OP641990	OP612380	OP602866	OP822118	OP600433	OTU18	2	P. patagonica
	NAV20-382	-54.9596	-67.6328	556	LSU_02	TUB_03	COR_04	ITS_03	RBC_08	SSU_06	OP602927	OP641991	OP612381	OP602867	OP822119	OP600434	OTU19	2	P. patagonica
	NAV20-383	-54.9595	-67.6328	554	LSU_02	TUB_04	COR_03	ITS_04	RBC_08	SSU_06	OP602928	OP641992	OP612382	OP602868	OP822120	OP600435	OTU20	2	P. patagonica
	NAV20-384	-54.9595	-67.6328	554	LSU_02	TUB_03	COR_03	ITS_10	RBC_08	SSU_06	OP602929	OP641993	OP612383	OP602869	OP822121	OP600436	OTU18	2	P. patagonica
	NAV20-385	-54.9595	-67.6328	553	LSU_02	TUB_03	COR_03	ITS_06	RBC_08	SSU_06	OP602930	OP641994	OP612384	OP602870	OP822122	OP600437	OTU18	2	P. patagonica
	NAV20-387	-54.9595	-67.6328	553	LSU_02	TUB_04	COR_03	ITS_08	RBC_08	SSU_06	OP602931	OP641995	OP612385	OP602871	OP822123	OP600438	OTU21	2	P. patagonica
	NAV20-389	-54.9595	-67.6328	552	LSU_02	TUB_03	COR_03	ITS_05	RBC_08	SSU_06	OP602932	OP641996	OP612386	OP602872	OP822124	OP600439	OTU18	2	P. patagonica
	NAV20-390	-54.9595	-67.6328	553	LSU_02	TUB_04	COR_03	ITS_03	RBC_08	SSU_06	OP602933	OP641997	OP612387	OP602873	OP822125	OP600440	OTU20	2	P. patagonica
	NAV20-391	-54.9595	-67.6329	552	LSU_02	TUB_04	COR_03	ITS_08	RBC_08	SSU_06	OP602934	OP641998	OP612388	OP602874	OP822126	OP600441	OTU21	2	P. patagonica
	NAV20-392	-54.9595	-67.6329	552	LSU_02	TUB_04	COR_03	ITS_07	RBC_08	SSU_06	OP602935	OP641999	OP612389	OP602875	OP822127	OP600442	OTU20	2	P. patagonica
	NAV20-393	-54.9595	-67.6329	552	LSU_02	TUB_04	COR_03	ITS_03	RBC_08	SSU_06	OP602936	OP642000	OP612390	OP602876	OP822128	OP600443	OTU20	2	P. patagonica
	NAV20-394	-54.9594	-67.6329	551	LSU_02	TUB_04	COR_03	ITS_03	RBC_08	SSU_06	OP602937	OP642001	OP612391	OP602877	OP822129	OP600444	OTU20	2	P. patagonica
	NAV20-395	-54.9594	-67.6329	549	LSU_04	TUB_05	COR_06	ITS_12	RBC_04	SSU_04	OP602938	OP642002	OP612392	OP602878	OP822130	OP600445	OTU22	5	Peltigera sp. 23
	NAV20-396	-54.9594	-67.633	548	LSU_04	TUB_05	COR_06	ITS_12	RBC_04	SSU_04	OP602939	OP642003	OP612393	OP602879	OP822131	OP600446	OTU22	5	Peltigera sp. 23
	NAV20-397	-54.9594	-67.633	548	LSU_04	TUB_05	COR_06	ITS_12	RBC_04	SSU_04	OP602940	OP642004	OP612394	OP602880	OP822132	OP600447	OTU22	5	Peltigera sp. 23
	NAV20-399	-54.9594	-67.633	547	LSU_02	TUB_04	COR_03	ITS_03	RBC_08	SSU_06	OP602941	OP642005	OP612395	OP602881	OP822133	OP600448	OTU20	2	P. patagonica
	NAV20-400	-54.9594	-67.6329	545	LSU_04	TUB_06	COR_05	ITS_15	RBC_04	SSU_04	OP602942	OP642006	OP612396	OP602882	OP822134	OP600449	OTU13	5	Peltigera sp. 23
	NAV20-401	-54.9594	-67.6328	547	LSU_04	TUB_06	COR_07	ITS_14	RBC_04	SSU_04	OP602943	OP642007	OP612397	OP602883	OP822135	OP600450	OTU17	5	Peltigera sp. 23
	NAV20-402	-54.9594	-67.6328	549	LSU_02	TUB_04	COR_04	ITS_07	RBC_08	SSU_06	OP602944	OP642008	OP612398	OP602884	OP822136	OP600451	OTU23	2	P. patagonica
