# Supplementary material for: High Andean Steppes of Southern Chile Contain Little-Explored Peltigera Lichen Symbionts
Source: J Fungi (Basel). 2023 Mar 18;9(3):372. doi: 10.3390/jof9030372 (PMC10058012; doi:10.3390/jof9030372)
Supplement: Supplementary file 1 [file jof-09-00372-s001.zip › Table S2.xlsx]

## Sheet: Hoja1
Table S2. BLASTn information for the sequences closest to the haplotypes of this study.
Symbiont	Haplotype	Query Cover	Per. Ident.	Acc. Len.	Accession	Max Score	Total Score	E value	Description
Mycobiont	LSU_01	0.99	0.998	1322	DQ986796	1853	1853	0	Peltigera hydrophila isolate AFTOL-ID 1838 28S large subunit ribosomal RNA gene, partial sequence
	LSU_02	1	0.999	1309	MK517852	1869	1869	0	Peltigera patagonica isolate P0076 large subunit ribosomal RNA gene, partial sequence
	LSU_03	1	1	1274	MK517858	1845	1845	0	Peltigera ponojensis isolate P0084 large subunit ribosomal RNA gene, partial sequence
	LSU_04	0.99	1	1207	AF286772	1871	1871	0	Peltigera ponojensis 3 large subunit ribosomal RNA gene, partial sequence
	LSU_05	0.99	1	1322	AY257928	1871	1871	0	Peltigera rufescens large subunit ribosomal RNA gene, partial sequence
	LSU_06	0.99	0.9941	1310	MK517863	1844	1844	0	Peltigera friesiorum isolate P1554 large subunit ribosomal RNA gene, partial sequence
	LSU_07	0.99	0.9941	1310	MK517863	1845	1845	0	Peltigera friesiorum isolate P1554 large subunit ribosomal RNA gene, partial sequence
	LSU_08	0.99	1	1280	AF286817	1877	1877	0	Peltigera sp. ('fuscopraetextata') 1 large subunit ribosomal RNA gene, partial sequence
	TUB_01	1	0.9928	584	MH770812	1003	1003	0	Peltigera aubertii isolate P1815 from Chile beta-tubulin (TUBB) gene, partial cds
	TUB_02	0.99	0.9982	585	MH770816	1013	1013	0	Peltigera frigida isolate P0427 from Argentina beta-tubulin (TUBB) gene, partial cds
	TUB_03	1	0.9874	585	MH770815	985	985	0	Peltigera frigida isolate P0422 from Chile beta-tubulin (TUBB) gene, partial cds
	TUB_04	1	0.9892	585	MH770815	990	990	0	Peltigera frigida isolate P0422 from Chile beta-tubulin (TUBB) gene, partial cds
	TUB_05	1	0.9982	584	MH770828	1016	1016	0	Peltigera antarctica isolate P2065 from Chile beta-tubulin (TUBB) gene, partial cds
	TUB_06	1	1	584	MH770828	1022	1022	0	Peltigera antarctica isolate P2065 from Chile beta-tubulin (TUBB) gene, partial cds
	TUB_07	1	0.9964	584	MH770828	1013	1013	0	Peltigera antarctica isolate P2065 from Chile beta-tubulin (TUBB) gene, partial cds
	TUB_08	1	0.9982	585	MH770825	1018	1018	0	Peltigera antarctica isolate P0442 from Chile beta-tubulin (TUBB) gene, partial cds
	TUB_09	1	0.9982	584	MH770887	1014	1014	0	Peltigera rufescens isolate P2043 from Chile beta-tubulin (TUBB) gene, partial cds
	TUB_10	1	0.9964	585	MH770889	1011	1011	0	Peltigera rufescens isolate P2203 from USA beta-tubulin (TUBB) gene, partial cds
	TUB_11	1	0.9982	588	MH770949	1022	1022	0	Peltigera fuscopraetextata (nom. ined.) isolate P2014 from Chile beta-tubulin (TUBB) gene, partial cds
	COR_01	1	0.9985	685	MH770259	1206	1206	0	Peltigera aubertii isolate P2037 from Chile sequence
	COR_02	1	0.9985	704	MH770263	1243	1243	0	Peltigera frigida isolate P0427 from Argentina sequence
	COR_03	1	1	707	MH770269	1254	1254	0	Peltigera patagonica isolate P0076 from Chile sequence
	COR_04	1	0.9985	707	MH770269	1249	1249	0	Peltigera patagonica isolate P0076 from Chile sequence
	COR_05	1	1	694	MH770300	1230	1230	0	Peltigera antarctica isolate P0077 from Chile sequence
	COR_06	1	1	694	MH770302	1230	1230	0	Peltigera antarctica isolate P2034 from Argentina sequence
	COR_07	1	0.9985	694	MH770300	1225	1225	0	Peltigera antarctica isolate P0077 from Chile sequence
	COR_08	1	1	696	MH770369	1234	1234	0	Peltigera rufescens isolate P2043 from Chile sequence
	COR_09	1	0.9822	699	MH770373	1173	1173	0	Peltigera rufescentiformis isolate P2142 from Kenya sequence
	COR_10	1	0.9807	699	MH770373	1168	1168	0	Peltigera rufescentiformis isolate P2142 from Kenya sequence
	COR_11	1	0.9807	699	MH770373	1168	1168	0	Peltigera rufescentiformis isolate P2142 from Kenya sequence
	COR_12	1	0.9987	776	MH770438	1376	1376	0	Peltigera fuscopraetextata (nom. ined.) isolate P2012 from Argentina sequence
	COR_13	1	1	776	MH770438	1382	1382	0	Peltigera fuscopraetextata (nom. ined.) isolate P2012 from Argentina sequence
	ITS_01	1	1	604	JX195333	1024	1024	0	Peltigera sp. AR8a 18S ribosomal RNA gene, partial sequence; internal transcribed spacer 1, 5.8S ribosomal RNA gene, and internal transcribed spacer 2, complete sequence; and 28S ribosomal RNA gene, partial sequence
	ITS_02	1	0.9947	671	MH758223	1035	1035	0	Peltigera frigida isolate P2041 from Chile small subunit ribosomal RNA gene, partial sequence; internal transcribed spacer 1, 5.8S ribosomal RNA gene, and internal transcribed spacer 2, complete sequence; and large subunit ribosomal RNA gene, partial sequence
	ITS_03	0.99	0.984	557	MH758226	983	983	0	Peltigera patagonica isolate P2049 from Argentina internal transcribed spacer 1, partial sequence; 5.8S ribosomal RNA gene, complete sequence; and internal transcribed spacer 2, partial sequence
	ITS_04	0.99	0.9822	557	MH758226	977	977	0	Peltigera patagonica isolate P2049 from Argentina internal transcribed spacer 1, partial sequence; 5.8S ribosomal RNA gene, complete sequence; and internal transcribed spacer 2, partial sequence
	ITS_05	0.99	0.9822	557	MH758226	979	979	0	Peltigera patagonica isolate P2049 from Argentina internal transcribed spacer 1, partial sequence; 5.8S ribosomal RNA gene, complete sequence; and internal transcribed spacer 2, partial sequence
	ITS_06	0.99	0.984	557	MH758226	983	983	0	Peltigera patagonica isolate P2049 from Argentina internal transcribed spacer 1, partial sequence; 5.8S ribosomal RNA gene, complete sequence; and internal transcribed spacer 2, partial sequence
	ITS_07	0.99	0.9767	557	MH758226	952	952	0	Peltigera patagonica isolate P2049 from Argentina internal transcribed spacer 1, partial sequence; 5.8S ribosomal RNA gene, complete sequence; and internal transcribed spacer 2, partial sequence
	ITS_08	1	0.9872	557	MH758226	832	832	0	Peltigera patagonica isolate P2049 from Argentina internal transcribed spacer 1, partial sequence; 5.8S ribosomal RNA gene, complete sequence; and internal transcribed spacer 2, partial sequence
	ITS_09	0.99	0.9768	557	MH758226	968	968	0	Peltigera patagonica isolate P2049 from Argentina internal transcribed spacer 1, partial sequence; 5.8S ribosomal RNA gene, complete sequence; and internal transcribed spacer 2, partial sequence
	ITS_10	0.99	0.9857	557	MH758226	989	989	0	Peltigera patagonica isolate P2049 from Argentina internal transcribed spacer 1, partial sequence; 5.8S ribosomal RNA gene, complete sequence; and internal transcribed spacer 2, partial sequence
	ITS_11	1	0.9982	656	MH758272	1014	1014	0	Peltigera antarctica isolate P0442 from Chile small subunit ribosomal RNA gene, partial sequence; internal transcribed spacer 1, 5.8S ribosomal RNA gene, and internal transcribed spacer 2, complete sequence; and large subunit ribosomal RNA gene, partial sequence
	ITS_12	1	0.9946	656	MH758275	1011	1011	0	Peltigera antarctica isolate P1805 from Antarctica small subunit ribosomal RNA gene, partial sequence; internal transcribed spacer 1, 5.8S ribosomal RNA gene, and internal transcribed spacer 2, complete sequence; and large subunit ribosomal RNA gene, partial sequence
	ITS_13	1	0.9982	656	MH758270	1014	1014	0	Peltigera antarctica isolate P2034 from Argentina small subunit ribosomal RNA gene, partial sequence; internal transcribed spacer 1, 5.8S ribosomal RNA gene, and internal transcribed spacer 2, complete sequence; and large subunit ribosomal RNA gene, partial sequence
	ITS_14	1	0.9982	656	MH758275	1016	1016	0	Peltigera antarctica isolate P1805 from Antarctica small subunit ribosomal RNA gene, partial sequence; internal transcribed spacer 1, 5.8S ribosomal RNA gene, and internal transcribed spacer 2, complete sequence; and large subunit ribosomal RNA gene, partial sequence
	ITS_15	1	0.9982	656	MH758275	1016	1016	0	Peltigera antarctica isolate P1805 from Antarctica small subunit ribosomal RNA gene, partial sequence; internal transcribed spacer 1, 5.8S ribosomal RNA gene, and internal transcribed spacer 2, complete sequence; and large subunit ribosomal RNA gene, partial sequence
	ITS_16	1	0.9982	656	MH758275	1016	1016	0	Peltigera antarctica isolate P1805 from Antarctica small subunit ribosomal RNA gene, partial sequence; internal transcribed spacer 1, 5.8S ribosomal RNA gene, and internal transcribed spacer 2, complete sequence; and large subunit ribosomal RNA gene, partial sequence
	ITS_17	0.99	0.992	517	JX195332	904	904	0	Peltigera rufescens isolate UK436 18S ribosomal RNA gene, partial sequence; internal transcribed spacer 1, 5.8S ribosomal RNA gene, and internal transcribed spacer 2, complete sequence; and 28S ribosomal RNA gene, partial sequence
	ITS_18	1	0.9902	585	KX354719	909	909	0	Peltigera rufescens voucher Guo & Han 20936 18S small subunit ribosomal RNA gene, partial sequence; internal transcribed spacer 1, 5.8S ribosomal RNA gene, and internal transcribed spacer 2, complete sequence; and 28S large subunit ribosomal RNA gene, partial sequence
	ITS_19	1	0.9426	611	MH758373	861	861	0	Peltigera rufescentiformis isolate P2143 from Kenya internal transcribed spacer 1, partial sequence; 5.8S ribosomal RNA gene, complete sequence; and internal transcribed spacer 2, partial sequence
	ITS_20	1	0.9409	611	MH758373	856	856	0	Peltigera rufescentiformis isolate P2143 from Kenya internal transcribed spacer 1, partial sequence; 5.8S ribosomal RNA gene, complete sequence; and internal transcribed spacer 2, partial sequence
	ITS_21	0.99	0.9459	602	MZ385668	874	874	0	Peltigera rufescentiformis voucher UK171388b internal transcribed spacer 1, partial sequence; 5.8S ribosomal RNA gene, complete sequence; and internal transcribed spacer 2, partial sequence
	ITS_22	1	0.9394	602	MZ385668	907	907	0	Peltigera rufescentiformis voucher UK171388b internal transcribed spacer 1, partial sequence; 5.8S ribosomal RNA gene, complete sequence; and internal transcribed spacer 2, partial sequence
	ITS_23	0.99	0.9407	602	MZ385668	909	909	0	Peltigera rufescentiformis voucher UK171388b internal transcribed spacer 1, partial sequence; 5.8S ribosomal RNA gene, complete sequence; and internal transcribed spacer 2, partial sequence
	ITS_24	1	0.9963	648	MH758506	1000	1000	0	Peltigera fuscopraetextata (nom. ined.) isolate P2067 from Chile small subunit ribosomal RNA gene, partial sequence; internal transcribed spacer 1, 5.8S ribosomal RNA gene, and internal transcribed spacer 2, complete sequence; and large subunit ribosomal RNA gene, partial sequence
	ITS_25	1	0.9982	648	MH758506	1005	1005	0	Peltigera fuscopraetextata (nom. ined.) isolate P2067 from Chile small subunit ribosomal RNA gene, partial sequence; internal transcribed spacer 1, 5.8S ribosomal RNA gene, and internal transcribed spacer 2, complete sequence; and large subunit ribosomal RNA gene, partial sequence
	ITS_26	1	0.9963	648	MH758506	998	998	0	Peltigera fuscopraetextata (nom. ined.) isolate P2067 from Chile small subunit ribosomal RNA gene, partial sequence; internal transcribed spacer 1, 5.8S ribosomal RNA gene, and internal transcribed spacer 2, complete sequence; and large subunit ribosomal RNA gene, partial sequence
	ITS_27	1	1	648	MH758506	1011	1011	0	Peltigera fuscopraetextata (nom. ined.) isolate P2067 from Chile small subunit ribosomal RNA gene, partial sequence; internal transcribed spacer 1, 5.8S ribosomal RNA gene, and internal transcribed spacer 2, complete sequence; and large subunit ribosomal RNA gene, partial sequence
Cyanobiont	SSU_01	1	0.9845	7828336	CP040272	1594	4775	0	Nostoc sp. C052 chromosome, complete genome
	SSU_02	0.99	0.9912	5468	JX219483	1637	1637	0	Nostoc sp. 'Peltigera malacea DB3992 cyanobiont' 16S ribosomal RNA gene, 16S-23S ribosomal RNA intergenic spacer, tRNA-Ile, tRNA-Ala, 23S ribosomal RNA, and 5S ribosomal RNA genes, complete sequence
	SSU_03	0.99	0.9901	5468	JX219483	1635	1635	0	Nostoc sp. 'Peltigera malacea DB3992 cyanobiont' 16S ribosomal RNA gene, 16S-23S ribosomal RNA intergenic spacer, tRNA-Ile, tRNA-Ala, 23S ribosomal RNA, and 5S ribosomal RNA genes, complete sequence
	SSU_04	1	0.9978	1469	KF359716	1670	1670	0	Nostoc sp. 'Peltigera frigida AR49 cyanobiont' 16S ribosomal RNA gene, partial sequence
	SSU_05	1	0.9945	1542	JQ007819	1653	1653	0	Uncultured Nostoc sp. clone UK161 16S ribosomal RNA gene, partial sequence
	SSU_06	1	0.9912	1347	FJ592871	1640	1640	0	Uncultured bacterium clone E09_SB4A 16S ribosomal RNA gene, partial sequence
	SSU_07	1	0.9934	1403	KY283060	1101	1101	0	Nostoc sp. ACSSI 161 16S ribosomal RNA gene, partial sequence
	RBC_01	1	0.9806	852	MH770620	1435	1435	0	Nostoc sp. 'cyanobiont of Peltigera neorufescens' isolate P2230 from USA ribulose-1,5-bisphosphate carboxylase/oxygenase large subunit (rbcL) gene, partial cds; and chaperonin-like protein (rbcX) gene, complete cds
	RBC_02	1	0.9794	852	MH770620	1430	1430	0	Nostoc sp. 'cyanobiont of Peltigera neorufescens' isolate P2230 from USA ribulose-1,5-bisphosphate carboxylase/oxygenase large subunit (rbcL) gene, partial cds; and chaperonin-like protein (rbcX) gene, complete cds
	RBC_03	1	0.9782	852	MH770620	1424	1424	0	Nostoc sp. 'cyanobiont of Peltigera neorufescens' isolate P2230 from USA ribulose-1,5-bisphosphate carboxylase/oxygenase large subunit (rbcL) gene, partial cds; and chaperonin-like protein (rbcX) gene, complete cds
	RBC_04	1	0.9988	837	MH770807	1517	1517	0	Nostoc sp. 'cyanobiont of Peltigera sp. 22 NM-2018' isolate P0926 from Colombia ribulose-1,5-bisphosphate carboxylase/oxygenase large subunit (rbcL) gene, partial cds; and chaperonin-like protein (rbcX) gene, complete cds
	RBC_05	1	1	861	MH770563	1522	1522	0	Nostoc sp. 'cyanobiont of Peltigera antarctica' isolate P0442 from Chile ribulose-1,5-bisphosphate carboxylase/oxygenase large subunit (rbcL) gene, partial cds; and chaperonin-like protein (rbcX) gene, complete cds
	RBC_06	1	0.9976	837	MH770807	1511	1511	0	Nostoc sp. 'cyanobiont of Peltigera sp. 22 NM-2018' isolate P0926 from Colombia ribulose-1,5-bisphosphate carboxylase/oxygenase large subunit (rbcL) gene, partial cds; and chaperonin-like protein (rbcX) gene, complete cds
	RBC_07	1	1	837	MH770807	1522	1522	0	Nostoc sp. 'cyanobiont of Peltigera sp. 22 NM-2018' isolate P0926 from Colombia ribulose-1,5-bisphosphate carboxylase/oxygenase large subunit (rbcL) gene, partial cds; and chaperonin-like protein (rbcX) gene, complete cds
	RBC_08	1	1	889	MH770525	1574	1574	0	Nostoc sp. 'cyanobiont of Peltigera patagonica' isolate P2015 from Chile ribulose-1,5-bisphosphate carboxylase/oxygenase large subunit (rbcL) gene, partial cds; and chaperonin-like protein (rbcX) gene, complete cds
	RBC_09	0.97	0.9989	890	MH770564	1626	1626	0	Nostoc sp. 'cyanobiont of Peltigera antarctica' isolate P2034 from Argentina ribulose-1,5-bisphosphate carboxylase/oxygenase large subunit (rbcL) gene, partial cds; and chaperonin-like protein (rbcX) gene, complete cds
	RBC_10	0.97	1	890	MH770564	1631	1631	0	Nostoc sp. 'cyanobiont of Peltigera antarctica' isolate P2034 from Argentina ribulose-1,5-bisphosphate carboxylase/oxygenase large subunit (rbcL) gene, partial cds; and chaperonin-like protein (rbcX) gene, complete cds
	RBC_11	1	0.9988	843	MH770512	1483	1483	0	Nostoc sp. 'cyanobiont of Peltigera aubertii' isolate P2037 from Chile ribulose-1,5-bisphosphate carboxylase/oxygenase large subunit (rbcL) gene, partial cds; and chaperonin-like protein (rbcX) gene, complete cds
