# Supplementary material for: High Andean Steppes of Southern Chile Contain Little-Explored Peltigera Lichen Symbionts
Source: J Fungi (Basel). 2023 Mar 18;9(3):372. doi: 10.3390/jof9030372 (PMC10058012; doi:10.3390/jof9030372)
Supplement: Supplementary file 1 [file jof-09-00372-s001.zip › Table S3.xlsx]

## Sheet: Hoja1
Table S3. Information of the Peltigera and Nostoc reference sequences used in this study.
Taxon	Clade	DNA id	Voucher/Published source	ITS	TUB	COR	RBC	Sequences used in phylogenies
								Mycobiont (concatenated)	Cyanobiont
P. austroamericana Zahlbr./ fibrilloides (Gyeln.) Vitik. 1	9	P0408	Colombia, Dumont & al. 4066 (H)	MH758440	MH770955	MH770444	MH770743	x	-
P. austroamericana Zahlbr./ fibrilloides (Gyeln.) Vitik. 2	9	P2059	Mexico, Herrera-Campos 13380 (MEXU)	MH758442	MH770956	MH770445	MH770744	x	-
P. austroamericana Zahlbr./ fibrilloides (Gyeln.) Vitik. 2	9	P2138	Mexico, Herrera-Campos 13381 (MEXU)	MH758462	MH770957	MH770446	MH770745	x	-
P. austroamericana Zahlbr./ fibrilloides (Gyeln.) Vitik. 3	9	P2048	Peru, Lutzoni 05.23.212-7 (DUKE 0357974)	MH758465	MH770958	MH770447	MH770746	x	-
P. austroamericana Zahlbr./ fibrilloides (Gyeln.) Vitik. 3	9	P2073	Peru, Rivas Plata & Ramos s.n. (DUKE 0357973)	MH758466	MH770959	MH770448	MH770747	x	-
P. austroamericana Zahlbr./ fibrilloides (Gyeln.) Vitik. 3	9	P2076	Colombia, Lücking 33628 (UDBC)	MH758451	MH770960	MH770449	MH770748	-	-
P. austroamericana Zahlbr./ fibrilloides (Gyeln.) Vitik. 3	9	P2197	Ecuador, Truong 3975 (DUKE 040152)	MH758460	MH770961	MH770450	MH770749	x	-
P. austroamericana Zahlbr./ fibrilloides (Gyeln.) Vitik. 4	9	P0025	Costa Rica, Miadlikowska & Lutzoni 23.03.03-8 (DUKE 0401856)	MH758453	MH770962	MH770451	MH770750	x	-
P. austroamericana Zahlbr./ fibrilloides (Gyeln.) Vitik. 4	9	P2060	Mexico, Herrera-Campos 137 (MEXU)	MH758461	MH770966	MH770452	MH770745	x	-
P. austroamericana Zahlbr./ fibrilloides (Gyeln.) Vitik. 5	9	P1598	Brazil, Miadlikowska & al. s.n. (CGMS 34505)	MH758438	MH770967	MH770453	MH770751	x	-
P. austroamericana Zahlbr./ fibrilloides (Gyeln.) Vitik. 5	9	P2010	Brazil, Canez 10234 (CGMS 35044)	MH758447	MH770968	MH770454	MH770753	x	-
P. austroamericana Zahlbr./ fibrilloides (Gyeln.) Vitik. 5	9	P2011	Brazil, Magain s.n. (CGMS 34427)	MH758448	MH770969	MH770455	MH770754	x	-
P. austroamericana Zahlbr./ fibrilloides (Gyeln.) Vitik. 5	9	P2052	Bolivia, Kukwa 8504 (ex UGDA-L-17700, DUKE dupl. 0401859)	MH758445	MH770971	MH770456	MH770757	x	-
P. austroamericana Zahlbr./ fibrilloides (Gyeln.) Vitik. 6	9	P2055	Peru, Bennett s.n. (WIS)	MH758444	MH770973	MH770458	MH770758	x	-
P. canina (L.) Willd. 1	9	P0014	Iceland, Miadlikowska & Lutzoni s.n. (DUKE 0357980)	KU954063	KM005803	MH770461	KX923097	-	-
P. canina (L.) Willd. 1	9	P2032	Russia: Krasnoyarsk Territory, Miadlikowska & Lutzoni s.n. (DUKE 0401836)	MH758478	MH770975	MH770462	MH770762	x	-
P. canina (L.) Willd. 1	9	P2120	Switzerland, Vust 279 (G)	MH758479	MH770979	MH770465	MH770766	x	-
P. canina (L.) Willd. 1	9	P2118	France: Corsica, Vust 6421 (G)	MH758471	MH770978	MH770464	MH770765	x	x
P. canina (L.) Willd. 1	9	P2123	France: Corsica, Vust 6412 (G)	MH758473	MH770980	MH770466	MH770767	x	x
P. canina (L.) Willd. 1	9	P2193	The Netherlands, Aptroot 53752 (ABL)	MH758474	MH770982	MH770467	MH770769	x	-
P. canina (L.) Willd. 1	9	P2213	Canada: BC, Goward 5305 (UBC)	MH758469	MH770983	MH770468	MH770770	x	-	78.9474
P. canina (L.) Willd. 2	9	P0004	Iceland, Miadlikowska & Lutzoni 08.08.10-3 (DUKE 0401829)	KU954062	KM005821	MH770470	KX923096	x	-
P. canina (L.) Willd. 2	9	P2026	U.S.A.: NC, Miadlikowska & Lutzoni s.n. (DUKE 0357999)	MH758483	MH770984	MH770471	MH770775	x	-
P. canina (L.) Willd. 2	9	P2081	U.S.A.: NC, Hollinger 2731 (UBC)	MH758484	MH770985	MH770472	MH770776	x	-
P. canina (L.) Willd. 2	9	P2090	U.S.A.: OK, Buck 46463 (DUKE 0138952)	MH758485	MH770986	MH770473	MH770777	x	-
P. canina (L.) Willd. 2	9	P2201	U.S.A.: UT, Truong 3996 (DUKE 0401865)	MH758486	MH770989	MH770475	MH770780	x	-
P. canina (L.) Willd. 2	9	P2221	U.S.A.: MI, Miadlikowska & Lutzoni s.n. (DUKE 0401826)	MH758488	MH770991	MH770476	MH770782	x	-
P. canina (L.) Willd. 2	9	P2222	U.S.A.: TN, Chen & Gajdeczka s.n. (DUKE 0401818)	MH758489	MH770992	MH770477	MH770783	x	-
P. evansiana Gyeln.	9	P1817	U.S.A.: PA, Lendemer 17422 (NY 01105603)	MH758491	KM005808	MH770478	MH770785	x	-
P. evansiana Gyeln.	9	P2084	U.S.A.: NC, Miadlikowska & Lutzoni s.n. (DUKE 0357991)	MH758493	MH770993	MH770479	MH770786	x	-
P. evansiana Gyeln.	9	P2189	U.S.A.: MI, Miadlikowska & al s.n. (DUKE 0401813)	MH758494	MH770994	MH770480	MH770787	x	-
P. “fuscopraetextata”	9	P2012	Argentina, Stenroos 2235 (H)	MH758500	MH770948	MH770438	MH770724	-	x
P. “fuscopraetextata”	9	P2014	Chile: Region XI, Rubio 4067 (H)	MH758503	MH770949	MH770439	MH770725	x	x
P. “fuscopraetextata”	9	P2036	Chile: Region XII, Goffinet 10490 (CONN)	MH758505	MH770951	MH770440	MH770729	x	x
P. “fuscopraetextata”	9	P2067	Chile: Region XII, Wheeler & Nelson 6528 (CONC)	MH758506	MH770952	MH770441	MH770730	-	x
P. “fuscopraetextata”	9	P2223	U.S.A.: UT, Truong 4016 (DUKE 0401863)	MH758509	MH770953	MH770443	MH770732	-	-
P. islandica T.Goward & S.S.Manoharan-Basil	9	IC332	Iceland, Andresson 332 (AMNH)	KJ413245	KJ413189	MH770481	-	x	-
P. islandica T.Goward & S.S.Manoharan-Basil	9	IC355	Iceland, Manoharan-Basil 355 (AMNH)	KJ413244	KJ413192	MH770482	-	x	-
P. praetextata (Flörke ex Sommerf.) Zopf	9	P0570	Norway, Magain s.n. (LG)	MH758515	KM005829	MH770485	MH770789	x	-
P. praetextata (Flörke ex Sommerf.) Zopf	9	P1515	China: Yunnan, Miadlikowska s.n. (DUKE 0357961)	MH758513	MH770996	MH770487	MH770792	x	-
P. praetextata (Flörke ex Sommerf.) Zopf	9	P2025	Russia: Karachaevo-Cherkesiya Republic, Zhurbenko s.n. (DUKE 0357996)	MH758518	MH770997	MH770488	MH770793	x	-
P. praetextata (Flörke ex Sommerf.) Zopf	9	P2092	U.S.A.: ME, Harris 53056 (DUKE 0138948)	MH758522	MH771000	MH770490	MH770795	x	-
P. praetextata (Flörke ex Sommerf.) Zopf	9	P2226	U.S.A.: MI, Miadlikowska & Lutzoni s.n. (DUKE 0357993)	MH758523	MH771002	MH770492	MH770797	x	-
P. praetextata (Flörke ex Sommerf.) Zopf	9	P2227	Russia: Khabarovsk Territory, Miadlikowska & Lutzoni s.n. (DUKE 0401831)	MH758519	MH771003	MH770493	MH770798	x	-
P. praetextata (Flörke ex Sommerf.) Zopf	9	P2233	U.S.A.: AZ, Miadlikowska & Lutzoni s.n. (DUKE 0401835)	MH758524	MH771004	MH770494	MH770800	x	-
P. sp. 18	9	P2094	India: Uttarakhand, Divakar s.n. (MAF)	MH758526	MH771006	MH770495	MH770802	x	-
P. sp. 19	9	P0078	U.S.A.: OR, McCune 31048 (OSC)	MH758528	MH771007	MH770496	MH770803	-	-
P. sp. 19	9	P1230	U.S.A.: OR, McCune 26686 (OSC)	MH758529	MH771008	MH770497	MH770804	-	-
P. sp. 19	9	P2030	U.S.A.: OR, McCune 30122 (OSC)	MH758530	MH771009	MH770498	MH770805	-	-
P. sp. 20	9	HOB14	Canada: BC, O’Brien 030611-10-0-4 (DUKE)	FJ708909	FJ709455	MH770499	KC437728	x	-
P. sp. 21	9	P2218	U.S.A.: AZ, Miadlikowska & Lutzoni s.n. (DUKE 0401825)	MH758525	MH771010	MH770502	MH770806	x	-
P. sp. 22	9	P0926	Colombia, Lücking MPNNC122 (UDBC)	MH758495	-	MH770503	MH770807	x	x
P. sp. 22	9	P2074	Peru, Miadlikowska s.n. (DUKE 0357976)	MH758499	-	MH770504	MH770810	x	-
P. sp. 22	9	P2077	Colombia, Lücking MPNNC92m (UDBC)	MH758497	-	MH770505	MH770811	x	-
P. friesiorum Gyeln.	6	P1647	Brazil, Miadlikowska & al. s.n. (CGMS 34539)	MH758328	MH770870	MH770351	MH770626	x	-
P. friesiorum Gyeln.	6	P2007	Brazil, Miadlikowska & al. s.n. (CGMS 34587)	MH758332	MH770874	MH770354	MH770631	x	-
P. friesiorum Gyeln.	6	P2035	Brazil, Spielmann & al. 9935 (CGMS 35048)	MH758335	MH770875	MH770355	MH770634	x	-
P. friesiorum Gyeln.	6	P1739	Peru, Miadlikowska s.n. (DUKE 0401814)	MH758337	MH770872	MH770353	MH770628	x	-
P. friesiorum Gyeln.	6	P2045	Bolivia, Kukwa 8465 (ex UGDA-L-17699 DUKE dupl.)	MH758322	MH770876	MH770356	MH770635	x	-
P. granulosa Sérus. & al.	6	P2176	Papua New Guinea, Sérusiaux 15150 (LG)	MH758338	MH770877	MH770357	MH770637	x	-
P. laciniata (G.Merr.) Gyeln. 1	6	P0026	Costa Rica, Miadlikowska & Lutzoni 23-0303-9 (DUKE 0401843)	MH758343	KM005815	MH770358	MH770638	x	-
P. laciniata (G.Merr.) Gyeln. 1	6	P2058	Ecuador, Yanez-Anabaca 2556 (CDF)	MH758347	MH770878	MH770359	MH770641	x	-
P. laciniata (G.Merr.) Gyeln. 1	6	P2075	Colombia, Lücking 33693 (UDBC)	MH758341	MH770879	MH770360	MH770642	x	-
P. laciniata (G.Merr.) Gyeln. 1	6	P2198	Ecuador, Truong 3956 (DUKE 0401842)	MH758350	MH770880	MH770361	MH770644	x	-
P. laciniata (G.Merr.) Gyeln. 2	6	P2051	Bolivia, Kukwa 9562 (ex UGDA-L-17724, DUKE dupl. 0401839)	MH758340	MH770881	MH770362	MH770646	x	-
P. lepidophora (Vain.) Bitter 1	6	P2124	Iceland, Kristinsson 49244 (AMNH LA-29491)	MH758353	MH770882	MH770364	MH770648	x	-
P. lepidophora (Vain.) Bitter 1	6	P2112	U.S.A.: NY, Lendemer 12047 (NY 0154474)	MH758355	MH770883	MH770365	MH770649	x	x
P. lepidophora (Vain.) Bitter 2	6	P2101	U.S.A.: AK, Miadlikowska & Lutzoni s.n. (DUKE 0357968)	MH758352	MH770884	MH770366	MH770650	x	x
P. “neorufescens” 1	6	P2061	Mexico, Barcenas-Peña 1229 (MEXU)	MH758362	MH770862	MH770343	MH770614	x	-
P. “neorufescens” 1	6	P2072	Costa Rica, Miadlikowska & al. s.n. (DUKE 0401820)	MH758360	MH770863	MH770344	MH770613	x	-
P. “neorufescens” 2	6	P2046	Bolivia, Kukwa 8958 (ex UGDA-L-17704, DUKE dupl. 0401871)	MH758357	MH770864	MH770345	MH770614	x	-
P. “neorufescens” 2	6	P2053	Peru, Bennett s.n. (WIS)	MH758363	MH770865	MH770346	MH770615	x	-
P. “neorufescens” 3	6	P2184	Germany, Sipman 53601 (B 600127393)	MH758361	MH770866	MH770347	MH770616	x	-
P. “neorufescens” 4	6	P2229	Canada: AB, Miadlikowska & Lutzoni s.n. (DUKE 0401823	MH758359	MH770867	MH770348	MH770617	x	-
P. “neorufescens” 5	6	P2086	Canada: YT, Lendemer 28945 (NY 0159332)	MH758358	MH770868	MH770349	MH770618	x	-
P. “neorufescens” 6	6	P2205	U.S.A.: UT, Truong 4023 (DUKE 0401868)	MH758364	MH770869	MH770350	MH770619	x	-
P. papuana Sérus. & al.	6	P2178	Papua New Guinea, Sérusiaux 13655 (LG)	MH758366	MH770885	MH770367	MH770653	x	x
P. rufescens (Weiss) Humb. 1	6	P2002	Denmark, Hansen s.n. (H)	MH758368	MH770886	MH770368	MH770655	x	-
P. rufescens (Weiss) Humb. 1	6	P2043	Chile: Region XII, Goffinet 7076 (CONN)	MH758367	MH770887	MH770369	MH770656	x	-
P. rufescens (Weiss) Humb. 1	6	P2083	U.S.A.: NC, Hollinger 2711 (UBC)	MH758370	MH770888	MH770370	MH770657	x	-
P. rufescens (Weiss) Humb. 1	6	P2203	U.S.A.: UT, Truong 4044 (DUKE 0401869)	-	MH770889	MH770371	MH770658	x	-
P. rufescens (Weiss) Humb. 2	6	P2071	Costa Rica, Miadlikowska & Lutzoni 23.03.03-3 (DUKE 0401870)	MH758371	MH770890	MH770372	MH770659	x	-
P. rufescentiformis (Gyeln.) C.W.Dodge	6	P2142	Kenya, Moberg 3983 (UPS L-536565)	MH758372	-	MH770373	MH770660	x	-
P. rufescentiformis (Gyeln.) C.W.Dodge	6	P2143	Kenya, Moberg 4324 (UPS L-536552)	MH758373	MH770891	MH770374	MH770661	x	-
P. soredians Vitik.	6	P2151	Ecuador, Kalb 39787 (DUKE)	MH758348	MH770892	MH770375	MH770664	x	-
P. soredians Vitik.	6	P2152	Ecuador, Kalb 39785 (DUKE)	MH758349	MH770893	MH770376	MH770665	x	x
P. sp. 15	6	P0432	Ecuador, Frisch 96/Eq101 (H)	MH758375	MH770894	MH770377	MH770667	x	-
P. sp. 15	6	P2153	Colombia, Lücking 34027 (UDBC)	MH758374	MH770895	MH770378	MH770668	x	-
P. spuriella Vain	6	P1648	Peru, Maldonado 14 (NY)	MH758329	MH770871	MH770352	MH770627	x	-
P. wulingensis L.F.Han & S.Y.Guo	6	P1348	Canada: QC, Gagnon s.n. (QFA 0595019)	MH758377	MH770896	MH770379	MH770669	x	-
P. wulingensis L.F.Han & S.Y.Guo	6	P2031	Russia: Krasnoyarsk Territory, Miadlikowska s.n. (DUKE 0357978)	MH758378	MH770897	MH770380	MH770670	x	-
P. wulingensis L.F.Han & S.Y.Guo	6	P2188	Canada: AB, Miadlikowska & Lutzoni s.n. (DUKE 0357979)	MH758376	MH770898	MH770381	MH770671	x	-
P. sp. 23	5	P0077	Chile: Region XII, Goffinet 6837 (CONN)	MH758271	MH770824	MH770300	KX923110	x	x
P. sp. 23	5	P0442	Chile: Region XI, Rubio 4073 (H)	MH758272	MH770825	MH770301	MH770563	-	x
P. sp. 23	5	P1805	South Orkney Islands, Lindsay 935 (H)	MH758275	MH770826	-	-	x	-
P. sp. 23	5	P2034	Argentina, Stenroos 1954 (H)	MH758270	-	MH770302	MH770564	x	x
P. sp. 23	5	P2044	Chile: Region XII, Goffinet 10521-2 (CONN)	MH758273	MH770827	MH770303	MH770565	x	-
P. sp. 23	5	P2065	Chile: Region X, Wheeler & Nelson 5893	MH758274	MH770828	MH770304	MH770566	x	x
P. ponojensis Gyeln./ monticola Vitik. 1a	5	P0084	U.S.A.: PA, Lendemer 13556 (H)	MH758276	MH770833	MH770309	KX923111	x	-
P. ponojensis Gyeln./ monticola Vitik. 1a	5	P2003	Canada: MB, Ahti 62717 (H)	MH758279	MH770834	MH770310	MH770574	x	-
P. ponojensis Gyeln./ monticola Vitik. 1a	5	P2028	U.S.A.: MO, Harris 48184 (NY 01180306)	MH758280	MH770835	MH770311	MH770575	x	-
P. ponojensis Gyeln./ monticola Vitik. 1a	5	P2180	U.S.A.: OR, McCune 29956 (OSC)	MH758281	MH770836	MH770312	MH770576	x	-
P. ponojensis Gyeln./ monticola Vitik. 1a	5	P2181	Canada: AB, Miadlikowska & Lutzoni s.n. (DUKE 0401809)	MH758282	MH770837	MH770313	MH770577	x	-
P. ponojensis Gyeln./ monticola Vitik. 1b	5	P2204	U.S.A.: UT, Truong 4045 (DUKE 0401866)	MH758284	MH770838	MH770314	MH770578	x	-
P. ponojensis Gyeln./ monticola Vitik. 2	5	P2004	Germany, Türk 34539 (H)	MH758285	MH770839	MH770315	MH770579	x	-
P. ponojensis Gyeln./ monticola Vitik. 2	5	P2175	Switzerland, Vust 1687 (G)	MH758287	MH770841	MH770317	MH770580	x	-
P. ponojensis Gyeln./ monticola Vitik. 8	5	P2208	U.S.A.: UT, Truong 4001 (DUKE 0401848)	MH758302	MH770852	MH770332	MH770595	x	-
P. ponojensis Gyeln./ monticola Vitik. 8	5	P2214	Canada: BC, Goward 5300 (UBC)	MH758305	MH770853	MH770333	MH770597	x	-
P. ponojensis Gyeln./ monticola Vitik. 8	5	P2215	U.S.A.: OR, Hardman s.n. (DUKE 0158521)	MH758304	MH770854	MH770334	MH770598	x	-
P. ponojensis Gyeln./ monticola Vitik. 9	5	NP20 (NP020)	China: Ningxia, Niu 12-0005 (Ningxia Univ.)	MH758307	MH770855	MH770335	MH770599	x	-
P. ponojensis Gyeln./ monticola Vitik. 9	5	P0073	Austria, Türk 37593 (H)	MH758310	KM005824	MH770336	KX923103	x	-
P. ponojensis Gyeln./ monticola Vitik. 9	5	P0419	Russia: Dagestan, Urbanavichus 0902150 (H)	MH758308	MH770856	MH770337	MH770590	x	x
P. ponojensis Gyeln./ monticola Vitik. 9	5	P2127	Switzerland, Vust s.n. (G)	MH758309	MH770857	MH770338	MH770591	x	-
P. ponojensis Gyeln./ monticola Vitik. 10a	5	P2000	U.S.A.: CA, Arnold 73 (YOSE 221393)	MH758311	MH770829	MH770305	MH770567	x	-
P. ponojensis Gyeln./ monticola Vitik. 10a	5	P2168	U.S.A.: CA, McCune 28024 (OSC)	MH758313	MH770830	MH770306	MH770568	x	-
P. ponojensis Gyeln./ monticola Vitik. 10a	5	P2187	U.S.A.: CA, McCune 29670 (OSC)	MH758314	MH770831	MH770307	MH770569	x	-
P. ponojensis Gyeln./ monticola Vitik. 10b	5	P2114	U.S.A.: UT, Truong & Magain s.n. (DUKE 0357983)	MH758312	MH770832	MH770308	MH770570	x	-
P. sp. 17	5	P1728	Peru, Lutzoni 05.22.2012-8 (DUKE 0401804)	MH758320	MH770858	MH770339	MH770610	x	-
P. sp. 17	5	P2164	Peru, Miadlikowska s.n. (DUKE 0357990)	MH758321	MH770859	MH770340	MH770611	x	-
P. sp. 17	5	P2195	Ecuador, Truong 3976 (DUKE 0401864)	MH758315	MH770861	MH770342	MH770613	x	-
P. aubertii C.W.Dodge	2	P2037	Chile: Region XII, Goffinet 10559 (CONN)	MH758230	MH770813	MH770259	MH770512	x	x
P. aubertii C.W.Dodge	2	P2056	Chile: Region X, Wheeler & Nelson 3191 (CONC)	MH758233	MH770814	MH770260	MH770515	x	x
P. aubertii C.W.Dodge	2	P1815	Chile: Region XII, Stenroos 2459 (H)	MH758229	MH770812	-	-	x	-
P. frigida R.Sant.	2	P2041	Chile: Region XII, Shaw 18024 (DUKE)	MH758223	-	MH770264	MH770521	x	x
P. frigida R.Sant.	2	P0422	Chile: Region XII, Stenroos 2192 (H)	MH758222	MH770815	MH770262	MH770518	x	x
P. frigida R.Sant.	2	P0427	Argentina, Stenroos 2158 (H)	MH758220	MH770816	MH770263	MH770519	x	x
P. kristinssonii Vitik.	2	HOB2 (HOB02)	Canada: BC, O’Brien 020708-70-5-9 (DUKE)	FJ708944	FJ709341	MH770266	-	x	-
P. kristinssonii Vitik.	2	P1292	Canada: QC, Gagnon s.n. (QFA-0594989)	MH758225	KM005796	MH770268	MH770523	x	-
P. patagonica Räsänen	2	P0076	Chile: Region XI, Rubio 4077 (H)	MH758227	-	MH770269	KX923108	x	x
P. patagonica Räsänen	2	P2013	Chile: Region XII, Stenroos 2427 (H)	MH758228	-	MH770270	MH770524	x	x
P. patagonica Räsänen	2	P2049	Argentina, Tibell 17450 (UPS 40293)	MH758226	-	MH770271	MH770526	x	x
P. hydrophila (P. sp. 14)	2	P1534	Chile: Region XII, Buck 47968 (NY)	MH758217	MH770817	MH770272	MH770527	x	-
P. hydrophila (P. sp. 14)	2	P2039	Chile: Region XII, Shaw 17848 (DUKE 0401861)	MH758218	MH770818	MH770273	MH770528	x	x
P. hydrophila (P. sp. 14)	2	P2062	Chile: Region X, Wheeler & Nelson 5191 (CONC)	MH758219	MH770819	MH770274	MH770529	x	x
P. sp. 16	2	P2186	U.S.A.: OR, McCune 31966 (OSC)	MH758235	-	MH770275	MH770530	x	x
P. retifoveata Vitik	1	P0074	Russia: Sakha Republic, Ahti 61821 (H)	MH758213	-	MH770257	MH770510	x	-
P. retifoveata Vitik	1	P2100	U.S.A.: AK, Miadlikowska & Lutzoni s.n. (DUKE 0357984)	MH758215	-	MH770258	MH770511	x	-
Nostoc sp. cyanobiont of Peltigera neorufescens	6	P2230	U.S.A	-	-	-	MH770620	-	x
Nostoc sp. cyanobiont of Peltigera aubertii	2	P2040	Chile	-	-	-	MH770513	-	x
Nostoc sp. cyanobiont of Peltigera monticola	5	P0419	Russia	-	-	-	MH770601	-	-
Nostoc sp. cyanobiont of Peltigera degenii	8	P2108	Austria, Türk 37593 (H)	-	-	-	MH770695	-	x
Nostoc sp. cyanobiont of Peltigera patagonica	2	P2015	Chile	-	-	-	MH770525	-	x
Fischerella muscicola		P7414		-	-	-	DQ185299	-	Otugroup
Nostoc sp. 'Stereocaulon exutum cyanobiont'		I28958R	Japan	-	-	-	DQ266029	-	Outgroup
